# Supplementary material for: IRGM Is a Common Target of RNA Viruses that Subvert the Autophagy Network
Source: PLoS Pathog. 2011 Dec 8;7(12):e1002422. doi: 10.1371/journal.ppat.1002422 (PMC3234227; doi:10.1371/journal.ppat.1002422)
Supplement: Table S2 — Autophagy-asscociated proteins used in experimental work. Complete cDNA for 35 autophagy-associated proteins were purchased from several different providers referenced in this table. Ensembl gene identifier, official name, supplier and purchased vector are indicated. (XLS) [file ppat.1002422.s011.xls]

## Sheet: Table S2
Ensembl gene id	Official name	Supplier	Vectors
ENSG00000110497	AMBRA1	Invitrogen (Ultimate ORF IOH27255)	pDONR221
ENSG00000152348	ATG10	hORFeome v3.1 (31040, G5)	pDONR223
ENSG00000145782	ATG12	Invitrogen (Ultimate ORF IOH40867)	pDONR221
ENSG00000085978	ATG16L1	Invitrogen (Ultimate ORF IOH43648)	pDONR221
ENSG00000144848	ATG3	hORFeome v3.1 (31016, C4)	pDONR223
ENSG00000101844	ATG4A	hORFeome v3.1 (31021,D3)	pDONR223
ENSG00000168397	ATG4B	Invitrogen (Ultimate ORF IOH4606)	pDONR221
ENSG00000168397	ATG4C	Invitrogen (Ultimate ORF IOH22446)	pDONR221
ENSG00000130734	ATG4D	Genescript	pDREAM 2.1
ENSG00000057663	ATG5	hORFeome v3.1 (11085, H2)	pDONR223
ENSG00000197548	ATG7	hORFeome v3.1 (11024, A5)	pDONR223
ENSG00000198925	ATG9A	Genescript	pDREAM 2.1
ENSG00000171552	BCL2L1	hORFeome v3.1 (11020, C2)	pDONR223
ENSG00000126581	BECN1	PMID 19837375	pDONR223
ENSG00000176171	BNIP3	hORFeome v3.1 (11019, B3)	pDONR223
ENSG00000188603	CLN3	Invitrogen (Ultimate ORF IOH3475)	pDONR221
ENSG00000170296	GABARAP	Invitrogen (Ultimate ORF IOH41289)	pDONR221
ENSG00000139112	GABARAPL1	Invitrogen (Ultimate ORF IOH14808)	pDONR221
ENSG00000034713	GABARAPL2	hORFeome v3.1 (11041, D9)	pDONR223
ENSG00000047932	GOPC	hORFeome v3.1 (11063,H10)	pDONR223
ENSG00000094631	HDAC6	Invitrogen (Ultimate ORF IOH53646)	pDONR221
ENSG00000237693	IRGM	Openbiosystems (40113047)	pCR-bluntII_TOPO
ENSG00000101460	MAP1LC3A	hORFeome v3.1 (11026 E8)	pDONR223
ENSG00000140941	MAP1LC3B	hORFeome v3.1 (11017, A7)	pDONR223
ENSG00000197769	MAP1LC3C	Invitrogen (Ultimate ORF IOH59918)	pDONR221
ENSG00000078142	PIK3C3	Invitrogen (Ultimate ORF IOH21022)	pDONR221
ENSG00000196455	PIK3R4	Invitrogen (Ultimate ORF IOH45214)	pDONR221
ENSG00000075785	RAB7A	Invitrogen (Ultimate ORF IOH40569)	pDONR221
ENSG00000023287	RB1CC1	Imagenes (RZPDo839H11148D)	pDONR201
ENSG00000097033	SH3GLB1	hORFeome v3.1 (11058, B5)	pDONR223
ENSG00000161011	SQSTM1	hORFeome v3.1 (11011, C11)	pDONR223
ENSG00000164841	TMEM74	Invitrogen (Ultimate ORF IOH22405)	pDONR221
ENSG00000177169	ULK1	Imagenes (EX-M0809-M15)	pRECEIVER-M15
ENSG00000198382	UVRAG	Invitrogen (Ultimate ORF IOH40504)	pDONR221
ENSG00000070540	WIPI1	hORFeome v3.1 (31006, C5)	pDONR223
